# Supplementary material for: Effect of solvent vapour annealing on polymer thin films and application in nonlinear optical fields
Source: Royal Society of Chemistry journal article supplement (doi:10.1039/c4tc00929k), 2014-01-01
Supplement: c4tc00929k1.pdf [file c4tc00929k1.pdf]

## Effect of Solvent Vapour Annealing on Polymer Thin Films and the Application on Nonlinear Optical Fields

Shiwei Wang,<sup>a</sup> Wanli Su,<sup>b</sup> Yunhui Li,<sup>b</sup> Rongwei Zhang,<sup>d</sup> Xibin Wang,<sup>c</sup> and Daming  
Zhang<sup>c</sup>

<sup>a</sup> Changchun Institute of Applied Chemistry, Chinese Academy of Sciences,  
Changchun 130022, China, E-mail: wswjldx2004@163.com

<sup>b</sup> Changchun University of Science & Technology, School of Chemistry &  
Environmental Engineering, Changchun, 130022, China. E-mail:  
liyh@cust.edu.cn

<sup>c</sup> College of Electronic Science & Engineering, Jilin University, Changchun  
130023, China

<sup>d</sup> Texas Instruments Incorporated, Boulevard Dallas, Texas, USA

### Table of Contents

**Figure S1.** Xray photoelectron spectroscopy (XPS) of the pure PMMA film before  
(A) and after (B) the treatment of THF vapour.

**Figure S2.** X ray diffraction (XRD) of pure DR1 power.

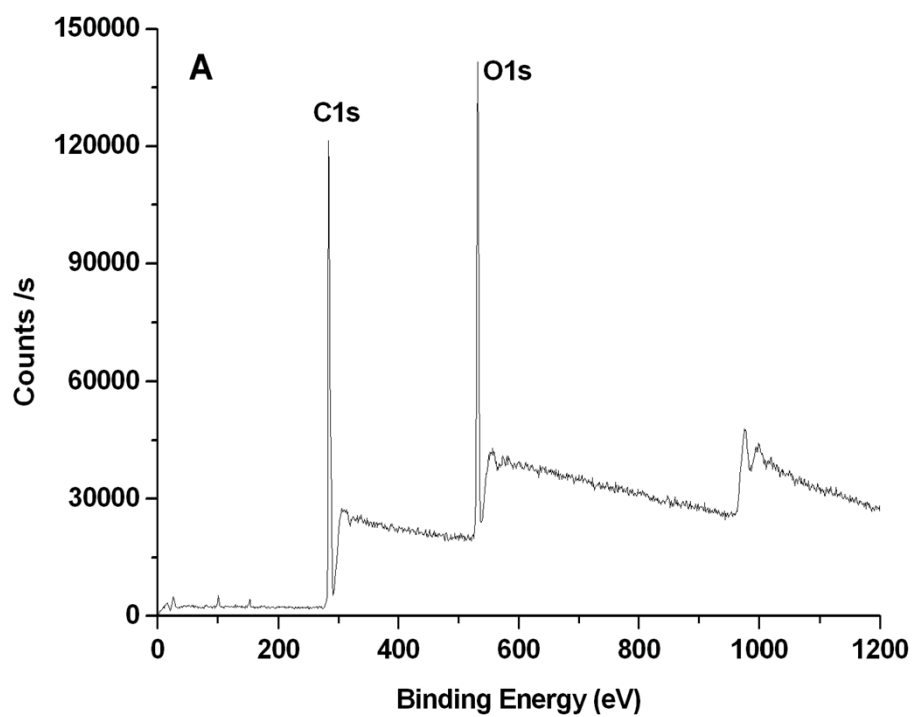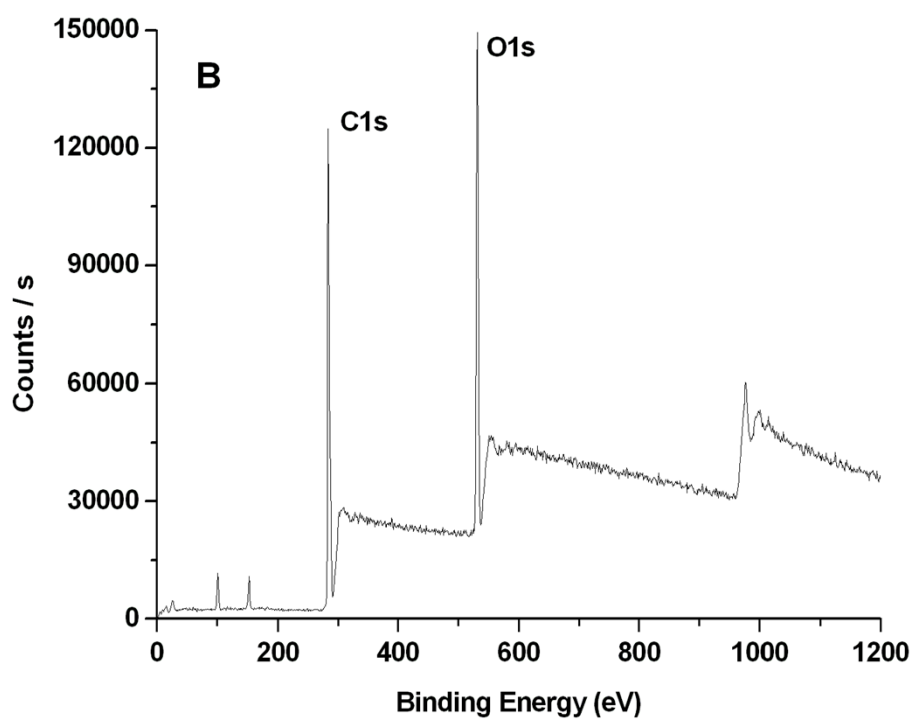

**Figure S1.** X-ray photoelectron spectroscopy (XPS) of the pure PMMA film before (A) and after (B) the treatment of THF vapour.

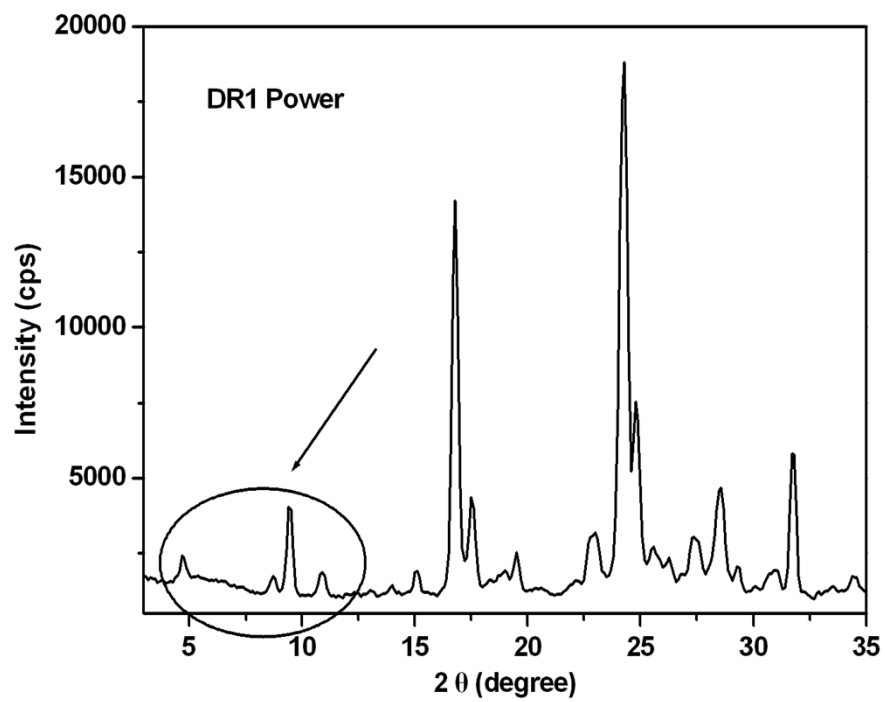

**Figure S2.** X ray diffraction (XRD) of pure DR1 power.
